# Supplementary material for: Caveolin-3 and Caveolin-1 Interaction Decreases Channel Dysfunction Due to Caveolin-3 Mutations
Source: MDPI journal article supplement (doi:10.3390/ijms25020980), 2024-01-12
Supplement: s1 [file s1]

Supplementary Figure 1

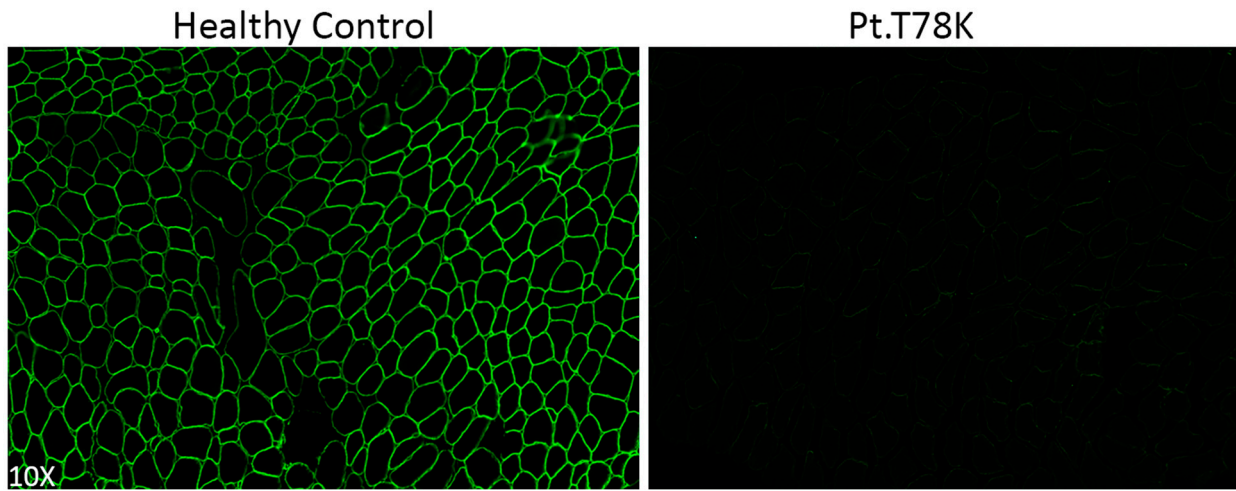

**Figure S1. Immunohistochemistry of Muscle biopsies of T78K patient.** Representative pictures of cav-3 expression in muscle biopsies. In control muscle, cav-3 displays a uniform pattern at the sarcolemma (left panel). CAV3 T78K mutation causes a severe decrease of cav-3 with an almost absent staining in the patient's section (right panel). Final magnification,  $\times 10$ .

Supplementary figure 2:

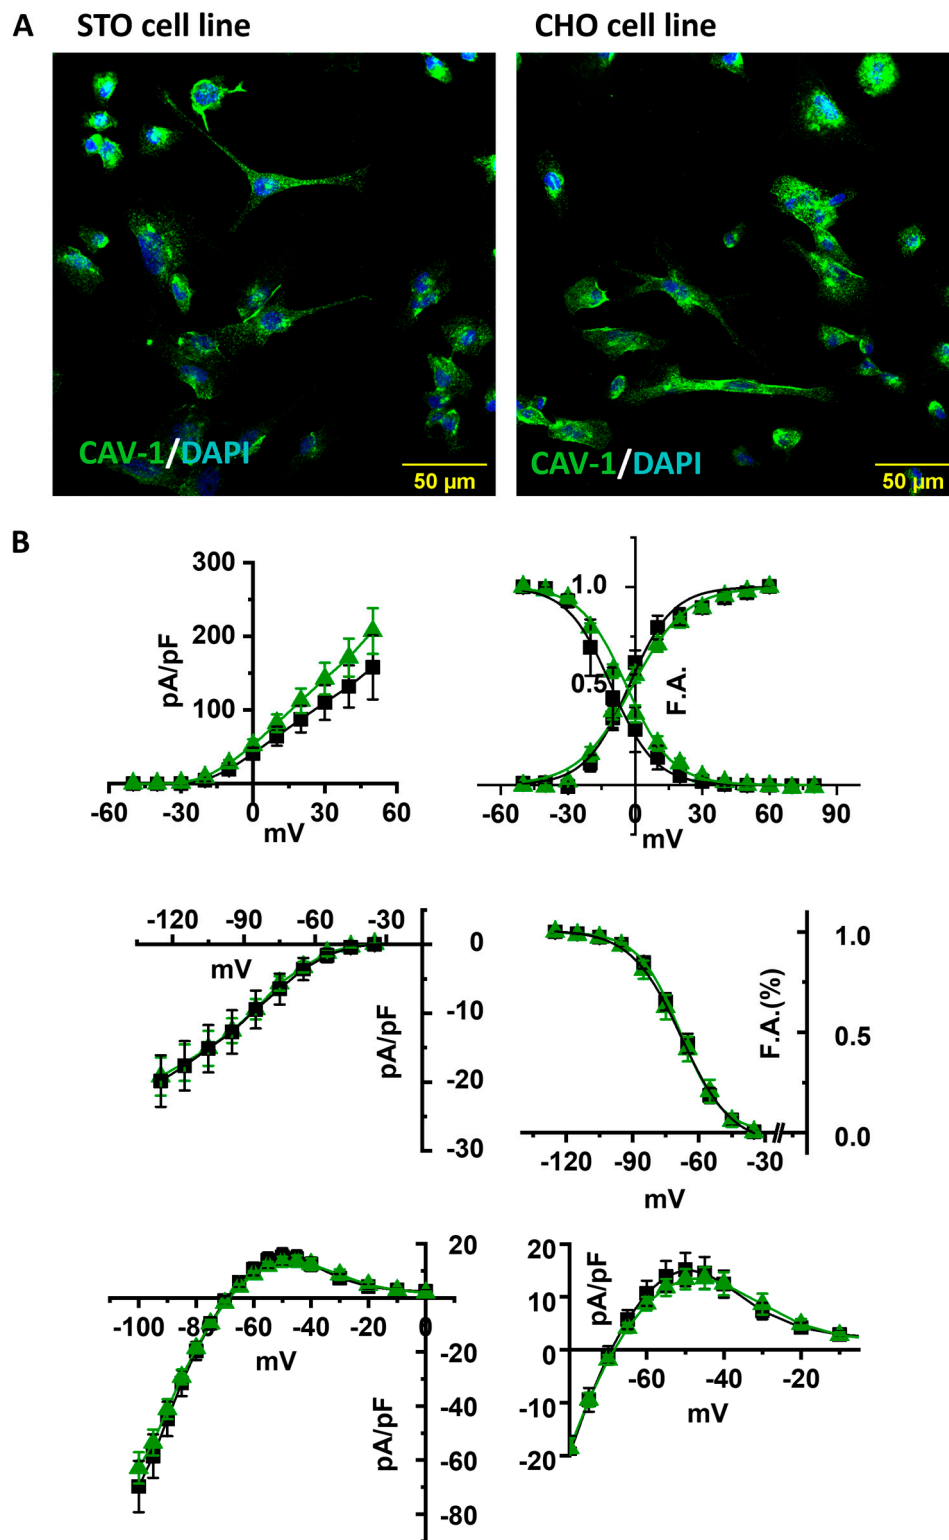

**Figure S2. T78K mutation effect on cav-1 expressing cells.** (A) Representative confocal images of STO-MEF left and CHO cells (right) stained with Abs displaying the endogenous expression of cav-1. (B) I-V relation of hKv1.5 current (top), hHCN4 current (middle) and hKir2.1 current recorded in transfected CHO cells with either WT Cav-3 or WT/T78K Cav-3. WT conditions are reported with black lines, and heterozygous conditions as green lines.

Supplementary figure 3.

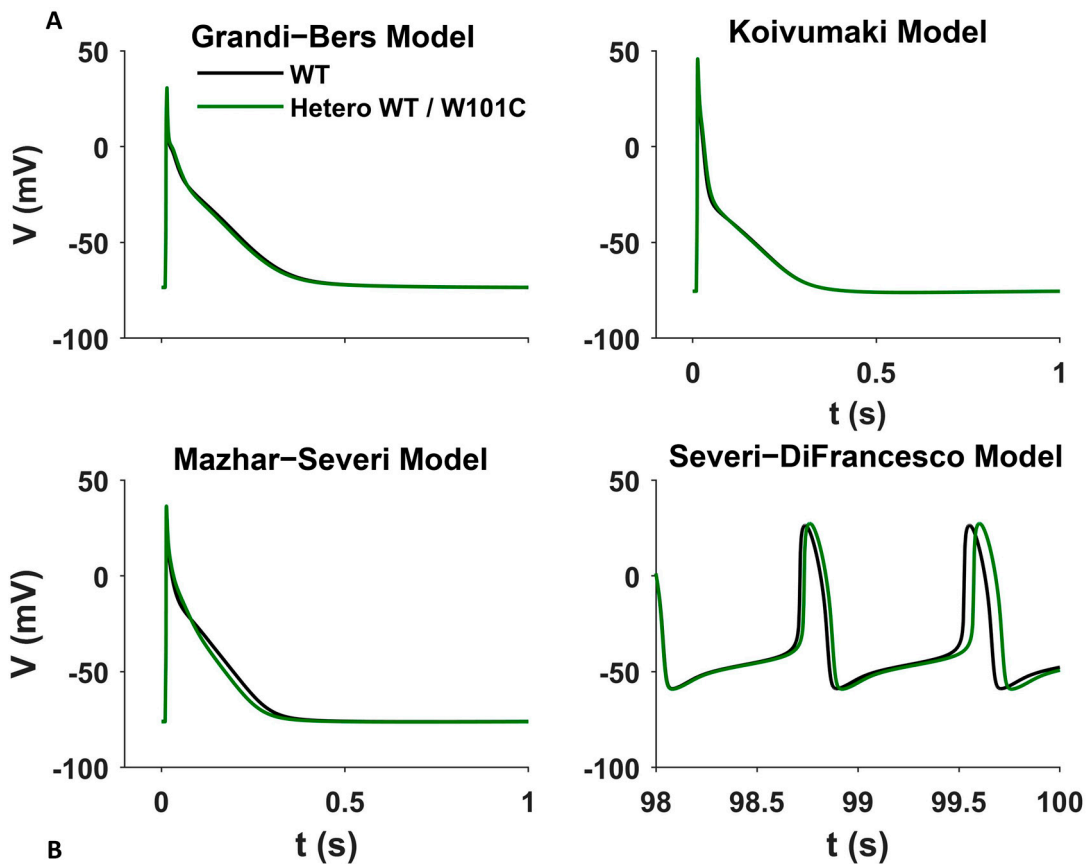

| Models             | APD <sub>90</sub> /<br>CL (ms) | MDP<br>(mV) | APD <sub>90</sub> /<br>CL (ms) | MDP<br>(mV) | ΔAPD90/<br>CL (ms) | ΔMDP<br>(mV) |
|--------------------|--------------------------------|-------------|--------------------------------|-------------|--------------------|--------------|
| Homo WT            |                                |             | Hetero<br>WT/W101C             |             |                    |              |
| Grandi-Bers        | 300                            | -73         | 290                            | -74         | -10                | -1           |
| Koivumaki          | 231                            | -75         | 229                            | -75         | -2                 | 0            |
| Mazhar-Severi      | 249                            | -76         | 225                            | -76         | -24                | 0            |
| Severi-DiFrancesco | 813                            | -59         | 839                            | -59         | +26                | 0            |

**Figure S3. Computational Modelling of the W101C mutation effect.** (A) Representative action potentials generated using the Courtmanche, Koivumaki and Grandi-Bers human atrial cell model showing the lack of any significant effect caused by the W101C cav-3 mutation. Representative action potentials generated using the Severi-DiFrancesco rabbit sinoatrial cell model. Black line, basal conditions (WT); green line, after insertion of the cav-3-W101C dependent alterations. (B) Summary table of the W101C effects on the different mathematical models analyzed.
